# Supplementary material
Source: HighWire-hosted journal article supplement (https://bmjopen.bmj.com/content/8/9/e023428)
Supplement: inline-supplementary-material-1 [file inline-supplementary-material-1.pdf]

**Appendices:**

**Appendix 1:** Table displaying the PRISMA-P 2015 Checklist

**PRISMA-P 2015 Checklist**

This checklist to be used for the Systematic Reviews protocol submission was adapted from Table 3 in Moher D et al: Preferred reporting items for systematic review and meta-analysis protocols (PRISMA-P) 2015 statement. Systematic Reviews 2015 4:1

| Section and Topic                 | #  | Checklist Item                                                                                                                                                                                  | Information reported                |                                     | Page number(s) |
|-----------------------------------|----|-------------------------------------------------------------------------------------------------------------------------------------------------------------------------------------------------|-------------------------------------|-------------------------------------|----------------|
|                                   |    |                                                                                                                                                                                                 | Yes                                 | No                                  |                |
| <b>Administrative information</b> |    |                                                                                                                                                                                                 |                                     |                                     |                |
| <b>Title</b>                      |    |                                                                                                                                                                                                 |                                     |                                     |                |
| identification                    | 1a | Identify the report as a protocol of a systematic review                                                                                                                                        | <input type="checkbox"/>            | <input checked="" type="checkbox"/> |                |
| Update                            | 1b | If the protocol is for an update of a previous systematic review, identify as such                                                                                                              | <input type="checkbox"/>            | <input checked="" type="checkbox"/> |                |
| <b>Registration</b>               | 2  | If registered, provide the name of the registry (such as PROSPERO) and registration number                                                                                                      | <input type="checkbox"/>            | <input checked="" type="checkbox"/> |                |
| <b>Authors</b>                    |    |                                                                                                                                                                                                 |                                     |                                     |                |
| Contact                           | 3a | Provide name, institutional affiliation, e-mail address of all protocol authors; provide physical mailing address of corresponding author                                                       | <input checked="" type="checkbox"/> | <input type="checkbox"/>            | 1              |
| Contributions                     | 3b | Describe contributions of protocol authors and identify the guarantor of the review                                                                                                             | <input checked="" type="checkbox"/> | <input type="checkbox"/>            | 11             |
| <b>Amendments</b>                 | 4  | If the protocol represents an amendment of a previously completed or published protocol, identify as such and list changes; otherwise, state plan for documenting important protocol amendments | <input type="checkbox"/>            | <input checked="" type="checkbox"/> |                |
| <b>Support</b>                    |    |                                                                                                                                                                                                 |                                     |                                     |                |
| Sources                           | 5a | Indicate sources of financial or other support for the review                                                                                                                                   | <input checked="" type="checkbox"/> | <input type="checkbox"/>            | 11             |

| Section and Topic         | #   | Checklist Item                                                                                                                                                                                                                | Information reported                |                          | Page number(s) |
|---------------------------|-----|-------------------------------------------------------------------------------------------------------------------------------------------------------------------------------------------------------------------------------|-------------------------------------|--------------------------|----------------|
|                           |     |                                                                                                                                                                                                                               | Yes                                 | No                       |                |
| Sponsor                   | 5b  | Provide name for the review funder and/or sponsor                                                                                                                                                                             | <input checked="" type="checkbox"/> | <input type="checkbox"/> | 11             |
| Role of Sponsor or Funder | 5c  | Describe roles of funder(s), sponsor(s), and/or institution(s), if any, in developing the protocol                                                                                                                            | <input checked="" type="checkbox"/> | <input type="checkbox"/> | 11             |
| <b>Introduction</b>       |     |                                                                                                                                                                                                                               |                                     |                          |                |
| Rationale                 | 6   | Describe the rationale for the review in the context of what is already known                                                                                                                                                 | <input checked="" type="checkbox"/> | <input type="checkbox"/> | 3-4            |
| Objectives                | 7   | Provide an explicit statement of the question(s) the review will address with reference to participants, interventions, comparators, and outcomes (PICO)                                                                      | <input checked="" type="checkbox"/> | <input type="checkbox"/> | 6              |
| <b>Methods</b>            |     |                                                                                                                                                                                                                               |                                     |                          |                |
| Eligibility criteria      | 8   | Specify the study characteristics (such as PICO, study design, setting, time frame) and report characteristics (such as years considered, language, publication status) to be used as criteria for eligibility for the review | <input checked="" type="checkbox"/> | <input type="checkbox"/> | 7-8            |
| Information sources       | 9   | Describe all intended information sources (such as electronic databases, contact with study authors, trial registers or other grey literature sources) with planned dates of coverage                                         | <input checked="" type="checkbox"/> | <input type="checkbox"/> | 6-7            |
| Search strategy           | 10  | Present draft of search strategy to be used for at least one electronic database, including planned limits, such that it could be repeated                                                                                    | <input checked="" type="checkbox"/> | <input type="checkbox"/> | 17             |
| <b>Study records:</b>     |     |                                                                                                                                                                                                                               |                                     |                          |                |
| Data management           | 11a | Describe the mechanism(s) that will be used to manage records and data throughout the review                                                                                                                                  | <input checked="" type="checkbox"/> | <input type="checkbox"/> | 7              |
| Selection process         | 11b | State the process that will be used for selecting studies (such as two independent reviewers) through each phase of the review (that is, screening, eligibility and inclusion in meta-analysis)                               | <input checked="" type="checkbox"/> | <input type="checkbox"/> | 7              |
| Section and Topic         | #   | Checklist Item                                                                                                                                                                                                                | Information                         |                          | Page           |

|                                    |     |                                                                                                                                                                                                                                                           | reported                            |                                     | number(s) |
|------------------------------------|-----|-----------------------------------------------------------------------------------------------------------------------------------------------------------------------------------------------------------------------------------------------------------|-------------------------------------|-------------------------------------|-----------|
|                                    |     |                                                                                                                                                                                                                                                           | Yes                                 | No                                  |           |
| Data collection process            | 11c | Describe planned method of extracting data from reports (such as piloting forms, done independently, in duplicate), any processes for obtaining and confirming data from investigators                                                                    | <input checked="" type="checkbox"/> | <input type="checkbox"/>            | 7, 18     |
| Data items                         | 12  | List and define all variables for which data will be sought (such as PICO items, funding sources), any pre-planned data assumptions and simplifications                                                                                                   | <input checked="" type="checkbox"/> | <input type="checkbox"/>            | 7-8       |
| Outcomes and prioritization        | 13  | List and define all outcomes for which data will be sought, including prioritization of main and additional outcomes, with rationale                                                                                                                      | <input checked="" type="checkbox"/> | <input type="checkbox"/>            | 7-10 18   |
| Risk of bias in individual studies | 14  | Describe anticipated methods for assessing risk of bias of individual studies, including whether this will be done at the outcome or study level, or both; state how this information will be used in data synthesis                                      | <input type="checkbox"/>            | <input checked="" type="checkbox"/> |           |
| Data synthesis                     | 15a | Describe criteria under which study data will be quantitatively synthesised                                                                                                                                                                               | <input type="checkbox"/>            | <input checked="" type="checkbox"/> |           |
|                                    | 15b | If data are appropriate for quantitative synthesis, describe planned summary measures, methods of handling data and methods of combining data from studies, including any planned exploration of consistency (such as I <sup>2</sup> , Kendall's $\tau$ ) | <input type="checkbox"/>            | <input checked="" type="checkbox"/> |           |
|                                    | 15c | Describe any proposed additional analyses (such as sensitivity or subgroup analyses, meta-regression)                                                                                                                                                     | <input type="checkbox"/>            | <input checked="" type="checkbox"/> |           |
|                                    | 15d | If quantitative synthesis is not appropriate, describe the type of summary planned                                                                                                                                                                        | <input type="checkbox"/>            | <input checked="" type="checkbox"/> |           |
| Meta bias(es)                      | 16  | Specify any planned assessment of meta-bias(es) (such as publication bias across studies, selective reporting within studies)                                                                                                                             | <input type="checkbox"/>            | <input checked="" type="checkbox"/> |           |
| Confidence in cumulative evidence  | 17  | Describe how the strength of the body of evidence will be assessed (such as GRADE)                                                                                                                                                                        | <input type="checkbox"/>            | <input checked="" type="checkbox"/> |           |

**Appendix 2: Proposed MEDLINE Literature Search Strategy**

| <b>Concept</b>                         | <b>Medical Subject Headings (MeSH)</b>                                                                                                                                                                                          | <b>Search terms</b>                                                                                                                                                                                                                                                                                                                                                                                                                                                                                                                                 |
|----------------------------------------|---------------------------------------------------------------------------------------------------------------------------------------------------------------------------------------------------------------------------------|-----------------------------------------------------------------------------------------------------------------------------------------------------------------------------------------------------------------------------------------------------------------------------------------------------------------------------------------------------------------------------------------------------------------------------------------------------------------------------------------------------------------------------------------------------|
| <b>Health Information Technologies</b> | Medical Informatics/                                                                                                                                                                                                            | electronic patient record* OR<br>electronic medical record* OR<br>personal health record* OR<br>Health information exchange or<br>technology OR telemedicine OR<br>text message* OR sms OR<br>telephone OR computerized<br>decision support system OR<br>public health informatic* OR<br>cellular phone* OR<br>smartphone* OR mobile* OR<br>ipad* or computer-assisted OR<br>user-computer interface OR<br>personal digital assistant OR<br>computer* OR handheld OR<br>electronic wearable device* OR<br>electronic wearable technology<br>OR data |
| <b>Primary Prevention</b>              | Quality of Life/<br>tobacco use/<br>smoking/<br>dietary services/<br>preventive health services/ early<br>intervention (education)/<br>early medical intervention/<br>health education/<br>primary prevention/<br>immunization/ | exercise OR physical activity OR<br>diet OR healthy behavior* OR<br>weightloss OR weight change<br>OR weight reduction OR weight<br>management OR weight gain OR<br>smoking cessation OR disease<br>prevention                                                                                                                                                                                                                                                                                                                                      |

**Appendix 3:** Data abstraction form

|                                                                                                           |                                                                                                                    |                     |
|-----------------------------------------------------------------------------------------------------------|--------------------------------------------------------------------------------------------------------------------|---------------------|
| <b>Reviewer</b>                                                                                           |                                                                                                                    | <b>Date</b>         |
| <b>Scoping review of Health information technology used for primary prevention in preventive medicine</b> |                                                                                                                    |                     |
| <b>Publication Information</b>                                                                            |                                                                                                                    |                     |
| <b>Study</b>                                                                                              |                                                                                                                    | <b>First Author</b> |
| <b>Year of Publication</b>                                                                                | <b>Journal</b>                                                                                                     |                     |
| <b>Country</b>                                                                                            | <b>Discipline</b>                                                                                                  |                     |
| <b>Health information technology(ies) studied</b>                                                         |                                                                                                                    |                     |
| <b>Objective 1</b>                                                                                        | <b>General description of the health information technology(ies) studied</b>                                       |                     |
|                                                                                                           | <b>The primary prevention purpose of the health information technology</b>                                         |                     |
| <b>Objective 2</b>                                                                                        | <b>Primary prevention patient outcome(s) studied</b>                                                               |                     |
| <b>Objective 3</b>                                                                                        | <b>Is there a comparator to the health information technology, if so, how is it different than the comparator?</b> |                     |
